# Supplementary material
Source: publisher figshare collection journal article supplement (https://gsajournals.figshare.com/articles/dataset/_/11719890)

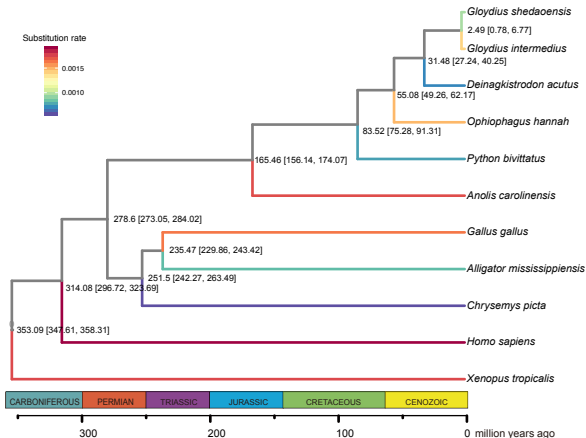

Supplement: Supplementary file 1 [file 1]
